# Supplementary material for: Production of Phenylacetylcarbinol via Biotransformation Using the Co-Culture of Candida tropicalis TISTR 5306 and Saccharomyces cerevisiae TISTR 5606 as the Biocatalyst
Source: MDPI journal article supplement (doi:10.3390/jof9090928), 2023-09-14
Supplement: s1 [file s1]

## Supplementary Data

**Table S1.** Kinetics data of *C. tropicalis* TISTR 5306 cultivated in SCBHM (250 mL scale): Part I.

| Time<br>(h) | [Cellobiose]<br>(g L <sup>-1</sup> ) |      | [Glucose]<br>(g L <sup>-1</sup> ) |     | [Xylose]<br>(g L <sup>-1</sup> ) |     | [Total sugars]<br>(g L <sup>-1</sup> ) |     | [Dried biomass]<br>(g L <sup>-1</sup> ) |      | Average Y <sub>X/S</sub><br>(g g <sup>-1</sup> ) |       | [Ethanol]<br>(g L <sup>-1</sup> ) |      |
|-------------|--------------------------------------|------|-----------------------------------|-----|----------------------------------|-----|----------------------------------------|-----|-----------------------------------------|------|--------------------------------------------------|-------|-----------------------------------|------|
|             | Avg                                  | SE   | Avg                               | SE  | Avg                              | SE  | Avg                                    | SE  | Avg                                     | SE   | Avg                                              | SE    | Avg                               | SE   |
| 0           | 11.0                                 | 0.43 | 51.0                              | 0.4 | 25.9                             | 0.2 | 87.9                                   | 0.6 | 0.11                                    | 0.00 | N/a                                              | N/a   | 0.3                               | 0.01 |
| 8           | 10.8                                 | 0.19 | 26.5                              | 1.0 | 23.9                             | 0.3 | 61.2                                   | 1.1 | 3.65                                    | 0.08 | 0.128                                            | 0.004 | 12.3                              | 0.62 |
| 16          | 10.8                                 | 0.10 | 0.0                               | 0.0 | 23.3                             | 0.2 | 34.1                                   | 0.2 | 5.77                                    | 0.13 | 0.103                                            | 0.002 | 25.6                              | 1.02 |
| 24          | 10.7                                 | 0.28 | 0.0                               | 0.0 | 23.3                             | 0.2 | 34.0                                   | 0.3 | 5.54                                    | 0.21 | 0.099                                            | 0.004 | 25.8                              | 1.22 |
| 32          | 10.7                                 | 0.31 | 0.0                               | 0.0 | 23.1                             | 0.3 | 33.8                                   | 0.4 | 5.18                                    | 0.19 | 0.092                                            | 0.004 | 26.3                              | 0.54 |
| 40          | 10.4                                 | 0.32 | 0.0                               | 0.0 | 21.8                             | 0.1 | 32.2                                   | 0.3 | 5.14                                    | 0.14 | 0.088                                            | 0.003 | 24.5                              | 1.16 |
| 48          | 10.3                                 | 0.10 | 0.0                               | 0.0 | 21.1                             | 0.2 | 31.4                                   | 0.2 | 5.13                                    | 0.08 | 0.087                                            | 0.001 | 23.7                              | 1.30 |
| 56          | 10.0                                 | 0.15 | 0.0                               | 0.0 | 20.1                             | 0.2 | 30.1                                   | 0.2 | 5.12                                    | 0.13 | 0.085                                            | 0.002 | 22.8                              | 0.96 |
| 64          | 10.0                                 | 0.27 | 0.0                               | 0.0 | 18.5                             | 0.1 | 28.5                                   | 0.3 | 4.98                                    | 0.15 | 0.080                                            | 0.003 | 22.4                              | 0.81 |
| 72          | 9.65                                 | 0.41 | 0.0                               | 0.0 | 17.3                             | 0.3 | 27.0                                   | 0.5 | 4.94                                    | 0.22 | 0.077                                            | 0.004 | 22.2                              | 0.63 |

**Note:** Avg is average value and SE is standard error.

**Table S2.** Kinetics data of *C. tropicalis* TISTR 5306 cultivated in SCBHM (250 mL scale): Part II.

| Time<br>(h) | Volumetric PDC<br>activity<br>(U mL <sup>-1</sup> ) |        | [Total protein]<br>(mg mL <sup>-1</sup> ) |        | Specific PDC<br>activity<br>(U mg <sup>-1</sup> ) |        | Average Y <sub>P/S</sub><br>(g g <sup>-1</sup> ) |       | FE (%) |     | Q <sub>P</sub><br>(g L <sup>-1</sup> h <sup>-1</sup> ) |      |
|-------------|-----------------------------------------------------|--------|-------------------------------------------|--------|---------------------------------------------------|--------|--------------------------------------------------|-------|--------|-----|--------------------------------------------------------|------|
|             | Avg                                                 | SE     | Avg                                       | SE     | Avg                                               | SE     | Avg                                              | SE    | Avg    | SE  | Avg                                                    | SE   |
| 0           | 0.002                                               | 0.0001 | 0.020                                     | 0.0008 | 0.100                                             | 0.0064 | N/a                                              | N/a   | N/a    | N/a | N/a                                                    | N/a  |
| 8           | 0.009                                               | 0.0002 | 0.464                                     | 0.0120 | 0.019                                             | 0.0007 | 0.449                                            | 0.024 | 87.9   | 4.7 | 1.50                                                   | 0.08 |
| 16          | 0.009                                               | 0.0004 | 0.620                                     | 0.0200 | 0.014                                             | 0.0008 | 0.470                                            | 0.019 | 92.0   | 3.7 | 1.58                                                   | 0.06 |
| 24          | 0.015                                               | 0.0003 | 0.614                                     | 0.0225 | 0.025                                             | 0.0010 | 0.473                                            | 0.023 | 92.6   | 4.5 | 1.06                                                   | 0.05 |
| 32          | 0.015                                               | 0.0004 | 0.703                                     | 0.0282 | 0.021                                             | 0.0010 | 0.481                                            | 0.011 | 94.0   | 2.2 | 0.81                                                   | 0.02 |
| 40          | 0.026                                               | 0.0010 | 0.743                                     | 0.0120 | 0.035                                             | 0.0015 | 0.434                                            | 0.021 | 85.0   | 4.1 | 0.61                                                   | 0.03 |
| 48          | 0.027                                               | 0.0012 | 0.815                                     | 0.0275 | 0.033                                             | 0.0018 | 0.414                                            | 0.023 | 81.0   | 4.5 | 0.49                                                   | 0.03 |
| 56          | 0.032                                               | 0.0009 | 0.768                                     | 0.0215 | 0.042                                             | 0.0017 | 0.389                                            | 0.017 | 76.2   | 3.3 | 0.40                                                   | 0.02 |
| 64          | 0.027                                               | 0.0012 | 0.753                                     | 0.0284 | 0.036                                             | 0.0021 | 0.372                                            | 0.014 | 72.8   | 2.7 | 0.35                                                   | 0.01 |
| 72          | 0.026                                               | 0.0011 | 0.699                                     | 0.0304 | 0.037                                             | 0.0023 | 0.359                                            | 0.012 | 70.3   | 2.4 | 0.30                                                   | 0.01 |

**Note:** Avg is average value and SE is standard error.

**Table S3.** Kinetics data of *S. cerevisiae* TISTR 5606 cultivated in SCBHM (250 mL scale): Part I.

| Time<br>(h) | [Cellobiose]<br>(g L <sup>-1</sup> ) |      | [Glucose]<br>(g L <sup>-1</sup> ) |     | [Xylose]<br>(g L <sup>-1</sup> ) |     | [Total sugars]<br>(g L <sup>-1</sup> ) |     | [Dried biomass]<br>(g L <sup>-1</sup> ) |      | Average Y <sub>X/S</sub><br>(g g <sup>-1</sup> ) |       | [Ethanol]<br>(g L <sup>-1</sup> ) |      |
|-------------|--------------------------------------|------|-----------------------------------|-----|----------------------------------|-----|----------------------------------------|-----|-----------------------------------------|------|--------------------------------------------------|-------|-----------------------------------|------|
|             | Avg                                  | SE   | Avg                               | SE  | Avg                              | SE  | Avg                                    | SE  | Avg                                     | SE   | Avg                                              | SE    | Avg                               | SE   |
| 0           | 10.8                                 | 0.43 | 49.5                              | 1.3 | 26.1                             | 0.7 | 86.4                                   | 1.5 | 0.29                                    | 0.04 | N/a                                              | N/a   | 0.20                              | 0.01 |
| 8           | 10.5                                 | 0.42 | 37.2                              | 0.7 | 23.2                             | 0.4 | 70.9                                   | 0.9 | 1.40                                    | 0.07 | 0.065                                            | 0.003 | 3.80                              | 0.08 |
| 16          | 10.4                                 | 0.71 | 37.1                              | 1.1 | 22.3                             | 0.6 | 69.8                                   | 1.5 | 2.10                                    | 0.08 | 0.103                                            | 0.004 | 4.10                              | 0.12 |
| 24          | 10.3                                 | 0.56 | 36.1                              | 0.5 | 21.5                             | 0.3 | 67.9                                   | 0.8 | 2.50                                    | 0.16 | 0.114                                            | 0.007 | 5.60                              | 0.39 |
| 32          | 10.2                                 | 0.34 | 26.7                              | 1.3 | 21.1                             | 0.7 | 58.0                                   | 1.5 | 2.75                                    | 0.15 | 0.083                                            | 0.005 | 11.2                              | 0.37 |
| 40          | 9.85                                 | 0.53 | 0.0                               | 0.0 | 21.0                             | 0.6 | 30.9                                   | 0.8 | 2.90                                    | 0.14 | 0.045                                            | 0.002 | 25.6                              | 0.57 |
| 48          | 8.93                                 | 0.16 | 0.0                               | 0.0 | 20.9                             | 0.3 | 29.8                                   | 0.3 | 2.90                                    | 0.10 | 0.044                                            | 0.002 | 26.7                              | 0.82 |
| 56          | 8.80                                 | 0.52 | 0.0                               | 0.0 | 19.7                             | 1.1 | 28.5                                   | 1.2 | 2.80                                    | 0.07 | 0.041                                            | 0.002 | 24.0                              | 0.81 |
| 64          | 8.30                                 | 0.42 | 0.0                               | 0.0 | 19.6                             | 0.7 | 27.9                                   | 0.8 | 2.72                                    | 0.11 | 0.040                                            | 0.002 | 24.4                              | 0.49 |
| 72          | 8.00                                 | 0.27 | 0.0                               | 0.0 | 19.5                             | 0.4 | 27.5                                   | 0.5 | 2.60                                    | 0.13 | 0.037                                            | 0.002 | 24.6                              | 0.67 |

**Note:** Avg is average value and SE is standard error.

**Table S4.** Kinetics data of *S. cerevisiae* TISTR 5606 cultivated in SCBHM (250 mL scale): Part II.

| Time<br>(h) | Volumetric PDC<br>activity<br>(U mL <sup>-1</sup> ) |        | [Total protein]<br>(mg mL <sup>-1</sup> ) |        | Specific PDC<br>activity<br>(U mg <sup>-1</sup> ) |        | Average Y <sub>P/S</sub><br>(g g <sup>-1</sup> ) |       | FE (%) |     | Q <sub>P</sub><br>(g L <sup>-1</sup> h <sup>-1</sup> ) |      |
|-------------|-----------------------------------------------------|--------|-------------------------------------------|--------|---------------------------------------------------|--------|--------------------------------------------------|-------|--------|-----|--------------------------------------------------------|------|
|             | Avg                                                 | SE     | Avg                                       | SE     | Avg                                               | SE     | Avg                                              | SE    | Avg    | SE  | Avg                                                    | SE   |
| 0           | 0.008                                               | 0.0003 | 0.066                                     | 0.0010 | 0.120                                             | 0.0049 | N/a                                              | N/a   | N/a    | N/a | N/a                                                    | N/a  |
| 8           | 0.014                                               | 0.0004 | 0.323                                     | 0.0176 | 0.043                                             | 0.0026 | 0.226                                            | 0.006 | 44.3   | 1.1 | 0.45                                                   | 0.01 |
| 16          | 0.018                                               | 0.0006 | 0.338                                     | 0.0168 | 0.053                                             | 0.0032 | 0.230                                            | 0.008 | 44.9   | 1.6 | 0.24                                                   | 0.01 |
| 24          | 0.018                                               | 0.0004 | 0.371                                     | 0.0505 | 0.047                                             | 0.0065 | 0.287                                            | 0.020 | 56.1   | 4.0 | 0.23                                                   | 0.02 |
| 32          | 0.027                                               | 0.0010 | 0.374                                     | 0.0358 | 0.071                                             | 0.0073 | 0.384                                            | 0.016 | 75.2   | 3.2 | 0.34                                                   | 0.01 |
| 40          | 0.027                                               | 0.0010 | 0.379                                     | 0.0267 | 0.070                                             | 0.0056 | 0.455                                            | 0.015 | 89.1   | 3.0 | 0.64                                                   | 0.01 |
| 48          | 0.029                                               | 0.0012 | 0.384                                     | 0.0194 | 0.075                                             | 0.0049 | 0.467                                            | 0.015 | 91.3   | 3.0 | 0.55                                                   | 0.02 |
| 56          | 0.031                                               | 0.0012 | 0.404                                     | 0.0178 | 0.077                                             | 0.0045 | 0.409                                            | 0.022 | 80.1   | 4.4 | 0.43                                                   | 0.01 |
| 64          | 0.040                                               | 0.0018 | 0.427                                     | 0.0199 | 0.093                                             | 0.0060 | 0.412                                            | 0.014 | 80.6   | 2.8 | 0.38                                                   | 0.01 |
| 72          | 0.042                                               | 0.0015 | 0.544                                     | 0.0222 | 0.078                                             | 0.0042 | 0.413                                            | 0.013 | 80.7   | 2.6 | 0.34                                                   | 0.01 |

**Note:** Avg is average value and SE is standard error.

**Table S5.** Kinetics data of co-culture cultivation of *C. tropicalis* TISTR 5306 and *S. cerevisiae* TISTR 5606 cultivated in SCBHM (250 mL scale): Part I.

| Time<br>(h) | [Cellobiose]<br>(g L <sup>-1</sup> ) |      | [Glucose]<br>(g L <sup>-1</sup> ) |     | [Xylose]<br>(g L <sup>-1</sup> ) |     | [Total sugars]<br>(g L <sup>-1</sup> ) |     | [Dried biomass]<br>(g L <sup>-1</sup> ) |       | Average Y <sub>X/S</sub><br>(g g <sup>-1</sup> ) |       | [Ethanol]<br>(g L <sup>-1</sup> ) |      |
|-------------|--------------------------------------|------|-----------------------------------|-----|----------------------------------|-----|----------------------------------------|-----|-----------------------------------------|-------|--------------------------------------------------|-------|-----------------------------------|------|
|             | Avg                                  | SE   | Avg                               | SE  | Avg                              | SE  | Avg                                    | SE  | Avg                                     | SE    | Avg                                              | SE    | Avg                               | SE   |
| 0           | 10.7                                 | 0.23 | 49.3                              | 1.7 | 26.4                             | 0.5 | 86.4                                   | 1.7 | 0.50                                    | 0.010 | N/a                                              | N/a   | 0.3                               | 0.01 |
| 8           | 10.6                                 | 0.32 | 27.6                              | 0.9 | 25.3                             | 0.5 | 63.5                                   | 1.1 | 3.80                                    | 0.083 | 0.139                                            | 0.004 | 10.5                              | 0.55 |
| 16          | 10.5                                 | 0.32 | 0.0                               | 0.0 | 24.2                             | 0.4 | 34.7                                   | 0.5 | 4.70                                    | 0.129 | 0.079                                            | 0.002 | 23.6                              | 0.57 |
| 24          | 10.3                                 | 0.23 | 0.0                               | 0.0 | 24.2                             | 0.3 | 34.5                                   | 0.3 | 5.04                                    | 0.108 | 0.085                                            | 0.002 | 24.0                              | 0.98 |
| 32          | 10.2                                 | 0.17 | 0.0                               | 0.0 | 23.9                             | 0.3 | 34.1                                   | 0.4 | 5.20                                    | 0.137 | 0.088                                            | 0.003 | 24.1                              | 0.97 |
| 40          | 10.2                                 | 0.42 | 0.0                               | 0.0 | 22.6                             | 0.4 | 32.8                                   | 0.6 | 5.30                                    | 0.070 | 0.088                                            | 0.002 | 25.1                              | 1.02 |
| 48          | 10.0                                 | 0.38 | 0.0                               | 0.0 | 21.8                             | 0.4 | 31.8                                   | 0.5 | 5.40                                    | 0.105 | 0.088                                            | 0.002 | 25.2                              | 0.66 |
| 56          | 9.6                                  | 0.20 | 0.0                               | 0.0 | 20.3                             | 0.1 | 29.9                                   | 0.2 | 5.50                                    | 0.056 | 0.087                                            | 0.001 | 25.2                              | 0.55 |
| 64          | 9.3                                  | 0.72 | 0.0                               | 0.0 | 19.6                             | 0.7 | 28.9                                   | 1.0 | 5.60                                    | 0.116 | 0.087                                            | 0.004 | 25.3                              | 0.70 |
| 72          | 9.0                                  | 0.21 | 0.0                               | 0.0 | 16.7                             | 0.4 | 25.7                                   | 0.4 | 5.60                                    | 0.075 | 0.082                                            | 0.002 | 26.4                              | 0.88 |

**Note:** Avg is average value and SE is standard error.

**Table S6.** Kinetics data of co-culture cultivation of *C. tropicalis* TISTR 5306 and *S. cerevisiae* TISTR 5606 cultivated in SCBHM (250 mL scale): Part II.

| Time<br>(h) | Volumetric PDC<br>activity<br>(U mL <sup>-1</sup> ) |        | [Total protein]<br>(mg mL <sup>-1</sup> ) |        | Specific PDC<br>activity<br>(U mg <sup>-1</sup> ) |        | Average Y <sub>P/S</sub><br>(g g <sup>-1</sup> ) |       | FE (%) |     | Q <sub>P</sub><br>(g L <sup>-1</sup> h <sup>-1</sup> ) |      |
|-------------|-----------------------------------------------------|--------|-------------------------------------------|--------|---------------------------------------------------|--------|--------------------------------------------------|-------|--------|-----|--------------------------------------------------------|------|
|             | Avg                                                 | SE     | Avg                                       | SE     | Avg                                               | SE     | Avg                                              | SE    | Avg    | SE  | Avg                                                    | SE   |
| 0           | 0.002                                               | 0.0001 | 0.028                                     | 0.0010 | 0.075                                             | 0.0045 | N/a                                              | N/a   | N/a    | N/a | N/a                                                    | N/a  |
| 8           | 0.004                                               | 0.0001 | 0.371                                     | 0.0156 | 0.012                                             | 0.0006 | 0.445                                            | 0.024 | 87.1   | 4.8 | 1.28                                                   | 0.07 |
| 16          | 0.008                                               | 0.0010 | 0.484                                     | 0.0215 | 0.016                                             | 0.0022 | 0.451                                            | 0.013 | 88.2   | 2.5 | 1.46                                                   | 0.04 |
| 24          | 0.011                                               | 0.0006 | 0.492                                     | 0.0170 | 0.022                                             | 0.0014 | 0.457                                            | 0.019 | 89.3   | 3.8 | 0.99                                                   | 0.04 |
| 32          | 0.018                                               | 0.0014 | 0.582                                     | 0.0207 | 0.032                                             | 0.0027 | 0.455                                            | 0.019 | 89.0   | 3.7 | 0.75                                                   | 0.03 |
| 40          | 0.025                                               | 0.0022 | 0.585                                     | 0.0192 | 0.043                                             | 0.0040 | 0.463                                            | 0.021 | 90.5   | 4.0 | 0.62                                                   | 0.03 |
| 48          | 0.025                                               | 0.0021 | 0.644                                     | 0.0251 | 0.039                                             | 0.0036 | 0.456                                            | 0.014 | 89.2   | 2.8 | 0.52                                                   | 0.01 |
| 56          | 0.031                                               | 0.0026 | 0.701                                     | 0.0230 | 0.044                                             | 0.0040 | 0.441                                            | 0.010 | 86.3   | 2.0 | 0.45                                                   | 0.01 |
| 64          | 0.031                                               | 0.0022 | 0.717                                     | 0.0283 | 0.043                                             | 0.0035 | 0.435                                            | 0.019 | 85.1   | 3.8 | 0.39                                                   | 0.01 |
| 72          | 0.039                                               | 0.0022 | 0.739                                     | 0.0300 | 0.053                                             | 0.0037 | 0.430                                            | 0.016 | 84.1   | 3.2 | 0.36                                                   | 0.01 |

**Note:** Avg is average value and SE is standard error.

**Table S7.** Kinetic profiles of concentration of PAC, [PAC] (mM), residual pyruvate, [Pyr] (mM), residual benzaldehyde, [Bz] (mM), benzoic acid, [Bzc] (mM), relative volumetric PDC activity, [Vol PDC] (%), pyruvate molarity balance, [Pyr Bal] (%), and benzaldehyde molarity balance, [Bz Bal] (%) during biotransformation in a single-phase emulsion system using the frozen – thawed whole cells biomass of *C. tropicalis* TISTR 5306. Avg represents average value and SE is standard error.

| Time<br>(min) | [PAC] (mM) |      | [Pyr] (mM) |     | [Bz] (mM) |     | [Bzc] (mM) |       | [Vol PDC] (%) |      | [Bz Bal] (%) |      | [Pyr Bal] (%) |      |
|---------------|------------|------|------------|-----|-----------|-----|------------|-------|---------------|------|--------------|------|---------------|------|
|               | Avg        | SE   | Avg        | SE  | Avg       | SE  | Avg        | SE    | Avg           | SE   | Avg          | SE   | Avg           | SE   |
| 0             | 0.00       | 0.00 | 120.0      | 1.2 | 100.0     | 1.1 | 0.65       | 0.005 | 100.00        | 0.69 | 100.00       | 1.10 | 100.00        | 1.00 |
| 1             | 0.73       | 0.02 | 115.0      | 1.0 | 98.8      | 1.4 | 0.66       | 0.001 | 98.22         | 2.33 | 99.53        | 1.40 | 96.44         | 0.83 |
| 2             | 0.76       | 0.04 | 113.8      | 0.8 | 98.7      | 1.1 | 0.67       | 0.001 | 90.67         | 0.55 | 99.46        | 1.10 | 95.47         | 0.67 |
| 3             | 0.99       | 0.06 | 113.0      | 0.7 | 98.3      | 1.0 | 0.68       | 0.002 | 90.53         | 3.43 | 99.29        | 1.00 | 94.99         | 0.59 |
| 4             | 1.03       | 0.19 | 112.8      | 1.1 | 98.3      | 0.6 | 0.68       | 0.001 | 86.69         | 0.41 | 99.33        | 0.63 | 94.86         | 0.93 |
| 5             | 1.52       | 0.13 | 111.6      | 2.0 | 97.4      | 1.3 | 0.69       | 0.002 | 80.52         | 0.14 | 98.92        | 1.31 | 94.27         | 1.67 |
| 10            | 1.72       | 0.08 | 111.3      | 1.1 | 97.1      | 1.6 | 0.69       | 0.001 | 60.34         | 0.41 | 98.82        | 1.60 | 94.18         | 0.92 |
| 15            | 1.92       | 0.05 | 111.0      | 1.3 | 96.8      | 0.7 | 0.70       | 0.003 | 49.11         | 0.27 | 98.72        | 0.70 | 94.10         | 1.08 |
| 20            | 2.45       | 0.07 | 110.6      | 2.2 | 95.9      | 1.2 | 0.70       | 0.001 | 45.40         | 0.14 | 98.35        | 1.20 | 94.21         | 1.83 |
| 25            | 2.65       | 0.01 | 108.8      | 2.9 | 95.5      | 1.2 | 0.71       | 0.001 | 38.96         | 3.57 | 98.15        | 1.20 | 92.88         | 2.42 |
| 30            | 2.75       | 0.01 | 107.3      | 3.1 | 95.4      | 0.6 | 0.71       | 0.001 | 36.08         | 0.14 | 98.15        | 0.60 | 91.71         | 2.58 |
| 60            | 2.78       | 0.05 | 107.0      | 1.0 | 95.3      | 1.1 | 0.71       | 0.001 | 34.57         | 4.25 | 98.08        | 1.10 | 91.48         | 0.83 |
| 90            | 2.88       | 0.08 | 106.8      | 2.0 | 95.1      | 0.6 | 0.71       | 0.001 | 34.57         | 2.33 | 97.98        | 0.61 | 91.40         | 1.67 |
| 120           | 2.98       | 0.12 | 105.4      | 1.6 | 95.0      | 2.0 | 0.72       | 0.003 | 33.74         | 0.41 | 97.98        | 2.00 | 90.32         | 1.34 |
| 150           | 3.14       | 0.08 | 104.0      | 1.1 | 94.7      | 1.2 | 0.72       | 0.001 | 33.33         | 0.96 | 97.84        | 1.20 | 89.28         | 0.92 |
| 180           | 3.18       | 0.08 | 103.8      | 1.0 | 94.6      | 0.6 | 0.73       | 0.004 | 32.37         | 0.14 | 97.78        | 0.61 | 89.15         | 0.84 |
| 210           | 3.21       | 0.11 | 103.2      | 0.6 | 94.6      | 0.9 | 0.74       | 0.001 | 32.24         | 0.82 | 97.81        | 0.91 | 88.68         | 0.51 |
| 240           | 3.24       | 0.13 | 102.0      | 0.6 | 94.5      | 3.2 | 0.74       | 0.001 | 31.96         | 0.96 | 97.74        | 3.20 | 87.70         | 0.51 |
| 270           | 3.64       | 0.15 | 100.8      | 0.5 | 93.9      | 0.9 | 0.75       | 0.004 | 31.82         | 0.14 | 97.54        | 0.91 | 87.03         | 0.44 |
| 300           | 3.81       | 0.09 | 100.8      | 1.1 | 93.6      | 0.7 | 0.75       | 0.003 | 31.69         | 1.78 | 97.41        | 0.71 | 87.18         | 0.92 |
| 330           | 3.84       | 0.17 | 99.4       | 0.6 | 93.5      | 0.9 | 0.77       | 0.009 | 31.28         | 0.82 | 97.34        | 0.92 | 86.03         | 0.52 |
| 360           | 4.50       | 0.19 | 97.2       | 1.2 | 92.4      | 0.7 | 0.78       | 0.051 | 29.63         | 0.96 | 96.90        | 0.73 | 84.75         | 1.01 |

**Table S8.** Kinetic profiles of concentration of PAC, [PAC] (mM), residual pyruvate, [Pyr] (mM), residual benzaldehyde, [Bz] (mM), benzoic acid, [Bzc] (mM), relative volumetric PDC activity, [Vol PDC] (%), pyruvate molarity balance, [Pyr Bal] (%), and benzaldehyde molarity balance, [Bz Bal] (%) during biotransformation in a single-phase emulsion system using the frozen – thawed whole cells of *S. cerevisiae* TISTR 5606. Avg represents average value and SE is standard error.

| Time<br>(min) | [PAC] (mM) |      | [Pyr] (mM) |     | [Bz] (mM) |     | [Bzc] (mM) |       | [Vol PDC] (%) |      | [Bz Bal] (%) |      | [Pyr Bal] (%) |      |
|---------------|------------|------|------------|-----|-----------|-----|------------|-------|---------------|------|--------------|------|---------------|------|
|               | Avg        | SE   | Avg        | SE  | Avg       | SE  | Avg        | SE    | Avg           | SE   | Avg          | SE   | Avg           | SE   |
| 0             | 0.00       | 0.00 | 120.0      | 1.0 | 100.0     | 0.6 | 0.67       | 0.008 | 100.00        | 1.14 | 100.00       | 0.57 | 100.00        | 0.88 |
| 1             | 0.00       | 0.00 | 119.5      | 0.6 | 100.0     | 1.0 | 0.68       | 0.001 | 92.05         | 0.68 | 100.00       | 1.01 | 99.58         | 0.54 |
| 2             | 0.00       | 0.00 | 119.4      | 1.1 | 99.9      | 0.5 | 0.69       | 0.003 | 84.09         | 1.25 | 99.90        | 0.52 | 99.50         | 0.93 |
| 3             | 0.00       | 0.00 | 119.2      | 1.9 | 99.2      | 0.8 | 0.66       | 0.002 | 82.95         | 1.48 | 99.20        | 0.76 | 99.33         | 1.61 |
| 4             | 0.00       | 0.00 | 118.5      | 0.8 | 99.1      | 0.7 | 0.65       | 0.001 | 80.68         | 2.50 | 99.10        | 0.67 | 98.75         | 0.68 |
| 5             | 0.00       | 0.00 | 117.6      | 1.9 | 99.0      | 0.7 | 0.67       | 0.002 | 78.76         | 2.61 | 99.00        | 0.68 | 98.02         | 1.56 |
| 10            | 0.00       | 0.00 | 118.4      | 1.0 | 99.0      | 0.7 | 0.68       | 0.003 | 77.65         | 1.48 | 99.00        | 0.69 | 98.70         | 0.79 |
| 15            | 0.00       | 0.00 | 118.0      | 0.9 | 98.3      | 0.7 | 0.69       | 0.005 | 75.14         | 2.39 | 98.30        | 0.68 | 98.36         | 0.78 |
| 20            | 0.00       | 0.00 | 116.9      | 1.9 | 98.0      | 0.9 | 0.65       | 0.003 | 72.73         | 1.14 | 98.00        | 0.87 | 97.43         | 1.58 |
| 25            | 0.00       | 0.00 | 116.6      | 1.6 | 98.0      | 0.9 | 0.63       | 0.004 | 71.73         | 1.48 | 98.00        | 0.87 | 97.18         | 1.30 |
| 30            | 0.00       | 0.00 | 117.0      | 0.5 | 97.9      | 0.8 | 0.63       | 0.002 | 70.50         | 1.36 | 97.90        | 0.76 | 97.52         | 0.44 |
| 60            | 0.00       | 0.00 | 116.3      | 0.6 | 97.8      | 0.6 | 0.69       | 0.002 | 69.80         | 0.45 | 97.80        | 0.55 | 96.93         | 0.48 |
| 90            | 0.00       | 0.00 | 115.3      | 1.2 | 97.3      | 0.7 | 0.69       | 0.003 | 69.13         | 1.82 | 97.30        | 0.73 | 96.08         | 0.96 |
| 120           | 0.00       | 0.00 | 115.0      | 1.0 | 97.1      | 0.5 | 0.70       | 0.004 | 68.20         | 1.70 | 97.10        | 0.53 | 95.83         | 0.86 |
| 150           | 0.00       | 0.00 | 114.5      | 0.6 | 97.0      | 1.1 | 0.71       | 0.003 | 67.50         | 1.25 | 97.00        | 1.13 | 95.40         | 0.48 |
| 180           | 0.00       | 0.00 | 113.9      | 0.9 | 96.6      | 1.1 | 0.71       | 0.002 | 66.18         | 1.36 | 96.60        | 1.13 | 94.89         | 0.76 |
| 210           | 0.00       | 0.00 | 113.8      | 1.0 | 96.6      | 1.2 | 0.71       | 0.003 | 64.91         | 1.82 | 96.60        | 1.22 | 94.81         | 0.83 |
| 240           | 0.00       | 0.00 | 112.0      | 1.7 | 96.5      | 0.6 | 0.72       | 0.002 | 63.77         | 1.36 | 96.50        | 0.60 | 93.38         | 1.42 |
| 270           | 0.00       | 0.00 | 112.6      | 1.0 | 96.2      | 1.3 | 0.73       | 0.001 | 61.50         | 1.59 | 96.20        | 1.29 | 93.88         | 0.84 |
| 300           | 0.00       | 0.00 | 112.4      | 1.1 | 96.1      | 0.8 | 0.71       | 0.008 | 60.36         | 1.70 | 96.10        | 0.81 | 93.71         | 0.93 |
| 330           | 0.00       | 0.00 | 108.2      | 0.7 | 95.9      | 1.0 | 0.72       | 0.002 | 59.23         | 1.59 | 95.90        | 0.96 | 90.16         | 0.61 |
| 360           | 0.00       | 0.00 | 106.8      | 0.8 | 95.6      | 0.3 | 0.73       | 0.003 | 57.45         | 0.68 | 95.60        | 0.34 | 88.98         | 0.68 |



**Table S9.** Kinetic profiles of concentration of PAC, [PAC] (mM), residual pyruvate, [Pyr] (mM), residual benzaldehyde, [Bz] (mM), benzoic acid, [Bzc] (mM), relative volumetric PDC activity, [Vol PDC] (%), pyruvate molarity balance, [Pyr Bal] (%), and benzaldehyde molarity balance, [Bz Bal] (%) during biotransformation in a single-phase emulsion system using the frozen – thawed whole cells of co-culture. Avg represents average value and SE is standard error.

| Time<br>(min) | [PAC] (mM) |      | [Pyr] (mM) |     | [Bz] (mM) |     | [Bzc] (mM) |       | [Vol PDC] (%) |      | [Bz Bal] (%) |      | [Pyr Bal] (%) |      |
|---------------|------------|------|------------|-----|-----------|-----|------------|-------|---------------|------|--------------|------|---------------|------|
|               | Avg        | SE   | Avg        | SE  | Avg       | SE  | Avg        | SE    | Avg           | SE   | Avg          | SE   | Avg           | SE   |
| 0             | 0.00       | 0.00 | 120.0      | 1.8 | 100.0     | 0.6 | 0.67       | 0.010 | 100.00        | 0.50 | 100.00       | 0.62 | 100.00        | 1.50 |
| 1             | 0.91       | 0.02 | 116.8      | 1.2 | 97.6      | 0.6 | 0.69       | 0.012 | 93.71         | 2.50 | 98.50        | 0.63 | 98.07         | 0.98 |
| 2             | 1.09       | 0.01 | 115.9      | 0.7 | 96.4      | 0.9 | 0.68       | 0.001 | 87.64         | 0.36 | 97.50        | 0.93 | 97.51         | 0.58 |
| 3             | 1.38       | 0.03 | 115.6      | 2.7 | 95.9      | 0.7 | 0.69       | 0.014 | 85.36         | 1.07 | 97.30        | 0.69 | 97.46         | 2.27 |
| 4             | 1.47       | 0.01 | 114.0      | 0.8 | 95.7      | 0.7 | 0.68       | 0.009 | 81.35         | 1.79 | 97.20        | 0.67 | 96.22         | 0.63 |
| 5             | 1.97       | 0.02 | 112.8      | 1.1 | 95.0      | 0.7 | 0.69       | 0.003 | 77.71         | 0.64 | 97.00        | 0.73 | 95.64         | 0.93 |
| 10            | 2.19       | 0.03 | 113.3      | 0.7 | 94.7      | 0.8 | 0.67       | 0.011 | 74.36         | 2.50 | 96.90        | 0.79 | 96.21         | 0.54 |
| 15            | 2.53       | 0.04 | 112.5      | 0.8 | 94.2      | 0.8 | 0.68       | 0.002 | 72.00         | 2.86 | 96.70        | 0.80 | 95.83         | 0.68 |
| 20            | 2.72       | 0.08 | 111.9      | 1.1 | 93.4      | 0.8 | 0.68       | 0.005 | 70.57         | 2.86 | 96.10        | 0.79 | 95.49         | 0.95 |
| 25            | 2.92       | 0.07 | 111.0      | 0.7 | 93.1      | 1.0 | 0.68       | 0.001 | 68.21         | 0.36 | 96.00        | 1.01 | 94.92         | 0.62 |
| 30            | 3.01       | 0.05 | 109.9      | 1.1 | 93.0      | 0.7 | 0.67       | 0.002 | 66.79         | 1.32 | 96.00        | 0.65 | 94.05         | 0.91 |
| 60            | 3.57       | 0.10 | 109.0      | 1.0 | 92.3      | 0.5 | 0.68       | 0.006 | 63.57         | 0.82 | 95.90        | 0.51 | 93.84         | 0.87 |
| 90            | 3.95       | 0.04 | 108.2      | 1.0 | 91.9      | 0.7 | 0.68       | 0.005 | 61.70         | 1.07 | 95.80        | 0.72 | 93.43         | 0.87 |
| 120           | 4.25       | 0.12 | 107.2      | 1.3 | 90.4      | 1.8 | 0.68       | 0.006 | 57.14         | 2.86 | 94.60        | 1.77 | 92.91         | 1.07 |
| 150           | 5.15       | 0.09 | 106.0      | 1.0 | 89.5      | 1.0 | 0.69       | 0.007 | 55.00         | 0.93 | 94.60        | 0.98 | 92.59         | 0.85 |
| 180           | 5.25       | 0.11 | 105.1      | 2.3 | 89.4      | 1.4 | 0.68       | 0.007 | 52.86         | 0.96 | 94.60        | 1.38 | 91.97         | 1.89 |
| 210           | 6.06       | 0.13 | 104.6      | 1.1 | 88.5      | 0.5 | 0.68       | 0.007 | 51.90         | 0.36 | 94.60        | 0.52 | 92.19         | 0.91 |
| 240           | 6.66       | 0.23 | 103.3      | 0.8 | 87.8      | 0.5 | 0.68       | 0.015 | 49.79         | 1.29 | 94.50        | 0.57 | 91.62         | 0.66 |
| 270           | 7.01       | 0.04 | 102.3      | 1.2 | 87.5      | 1.2 | 0.68       | 0.004 | 46.79         | 1.68 | 94.50        | 1.17 | 91.06         | 1.03 |
| 300           | 7.03       | 0.17 | 102.0      | 1.2 | 87.4      | 0.9 | 0.68       | 0.001 | 40.50         | 0.71 | 94.40        | 0.88 | 90.88         | 0.97 |
| 330           | 7.43       | 0.21 | 99.9       | 0.8 | 87.0      | 3.3 | 0.68       | 0.002 | 36.29         | 1.07 | 94.40        | 3.30 | 89.41         | 0.68 |
| 360           | 8.65       | 0.08 | 96.6       | 1.1 | 85.7      | 1.8 | 0.68       | 0.010 | 32.50         | 1.25 | 94.30        | 1.80 | 87.71         | 0.95 |

**Table S10.** Kinetics data of co-culture cultivation of *C. tropicalis* TISTR 5306 and *S. cerevisiae* TISTR 5606 cultivated in SCBHM (100 L bioreactor): Part I.

| Time<br>(h) | [Cellobiose]<br>(g L <sup>-1</sup> ) |      | [Glucose]<br>(g L <sup>-1</sup> ) |     | [Xylose]<br>(g L <sup>-1</sup> ) |     | [Total sugars]<br>(g L <sup>-1</sup> ) |     | [Dried biomass]<br>(g L <sup>-1</sup> ) |      | Average Y <sub>X/S</sub><br>(g g <sup>-1</sup> ) |       | [Ethanol]<br>(g L <sup>-1</sup> ) |      |
|-------------|--------------------------------------|------|-----------------------------------|-----|----------------------------------|-----|----------------------------------------|-----|-----------------------------------------|------|--------------------------------------------------|-------|-----------------------------------|------|
|             | Avg                                  | SE   | Avg                               | SE  | Avg                              | SE  | Avg                                    | SE  | Avg                                     | SE   | Avg                                              | SE    | Avg                               | SE   |
| 0           | 10.9                                 | 0.33 | 46.3                              | 1.5 | 26.8                             | 0.5 | 84.0                                   | 1.6 | 0.34                                    | 0.01 | N/a                                              | N/a   | 0.3                               | 0.01 |
| 8           | 10.4                                 | 0.24 | 41.8                              | 0.8 | 24.9                             | 0.1 | 77.1                                   | 0.8 | 8.03                                    | 0.17 | 1.071                                            | 0.025 | 3.1                               | 0.05 |
| 16          | 9.40                                 | 0.24 | 38.2                              | 0.2 | 24.1                             | 0.2 | 71.7                                   | 0.4 | 8.77                                    | 0.07 | 0.656                                            | 0.006 | 5.8                               | 0.32 |
| 24          | 8.93                                 | 0.31 | 22.3                              | 0.6 | 23.2                             | 0.5 | 54.4                                   | 0.8 | 10.9                                    | 0.2  | 0.346                                            | 0.007 | 11.2                              | 0.40 |
| 32          | 8.78                                 | 0.24 | 3.3                               | 0.1 | 22.9                             | 0.2 | 35.0                                   | 0.3 | 11.3                                    | 0.1  | 0.216                                            | 0.002 | 15.8                              | 0.30 |
| 40          | 8.62                                 | 0.31 | 0.0                               | 0.0 | 21.8                             | 0.4 | 30.4                                   | 0.5 | 11.5                                    | 0.1  | 0.202                                            | 0.004 | 18.5                              | 0.30 |
| 48          | 8.62                                 | 0.08 | 0.0                               | 0.0 | 21.4                             | 0.5 | 30.0                                   | 0.5 | 11.7                                    | 0.1  | 0.204                                            | 0.004 | 20.4                              | 0.30 |
| 60          | 6.98                                 | 0.13 | 0.0                               | 0.0 | 21.4                             | 0.4 | 28.4                                   | 0.4 | 11.8                                    | 0.1  | 0.200                                            | 0.003 | 21.7                              | 0.50 |
| 72          | 6.49                                 | 0.17 | 0.0                               | 0.0 | 21.0                             | 0.2 | 27.5                                   | 0.3 | 12.2                                    | 0.1  | 0.204                                            | 0.003 | 19.5                              | 0.30 |
| 84          | 6.31                                 | 0.25 | 0.0                               | 0.0 | 20.4                             | 0.5 | 26.7                                   | 0.6 | 12.4                                    | 0.2  | 0.204                                            | 0.006 | 19.3                              | 0.55 |
| 96          | 5.77                                 | 0.18 | 0.0                               | 0.0 | 20.3                             | 0.2 | 26.1                                   | 0.2 | 12.4                                    | 0.1  | 0.203                                            | 0.002 | 19.0                              | 0.35 |
| 108         | 5.42                                 | 0.11 | 0.0                               | 0.0 | 19.3                             | 0.5 | 24.8                                   | 0.5 | 12.5                                    | 0.1  | 0.199                                            | 0.004 | 18.6                              | 0.42 |
| 120         | 5.40                                 | 0.16 | 0.0                               | 0.0 | 19.3                             | 0.6 | 24.6                                   | 0.6 | 12.5                                    | 0.2  | 0.200                                            | 0.006 | 18.5                              | 0.21 |

**Note:** Avg is average value and SE is standard error.

**Table S11.** Kinetics data of co-culture cultivation of *C. tropicalis* TISTR 5306 and *S. cerevisiae* TISTR 5606 cultivated in SCBHM (100 L bioreactor): Part II.

| Time<br>(h) | Volumetric PDC<br>activity<br>(U mL <sup>-1</sup> ) |        | [Total protein]<br>(mg mL <sup>-1</sup> ) |        | Specific PDC<br>activity<br>(U mg <sup>-1</sup> ) |        | Average Y <sub>P/S</sub><br>(g g <sup>-1</sup> ) |       | FE (%) |     | Q <sub>P</sub><br>(g L <sup>-1</sup> h <sup>-1</sup> ) |        |
|-------------|-----------------------------------------------------|--------|-------------------------------------------|--------|---------------------------------------------------|--------|--------------------------------------------------|-------|--------|-----|--------------------------------------------------------|--------|
|             | Avg                                                 | SE     | Avg                                       | SE     | Avg                                               | SE     | Avg                                              | SE    | Avg    | SE  | Avg                                                    | SE     |
| 0           | 0.006                                               | 0.0002 | 0.041                                     | 0.0010 | 0.134                                             | 0.0059 | N/a                                              | N/a   | N/a    | N/a | N/a                                                    | N/a    |
| 8           | 0.023                                               | 0.0009 | 1.245                                     | 0.0260 | 0.018                                             | 0.0008 | 0.413                                            | 0.008 | 80.8   | 1.6 | 0.36                                                   | 0.01   |
| 16          | 0.033                                               | 0.0011 | 1.320                                     | 0.0400 | 0.025                                             | 0.0011 | 0.449                                            | 0.025 | 87.8   | 4.9 | 0.35                                                   | 0.02   |
| 24          | 0.067                                               | 0.0036 | 1.414                                     | 0.0500 | 0.048                                             | 0.0031 | 0.370                                            | 0.014 | 72.4   | 2.8 | 0.46                                                   | 0.02   |
| 32          | 0.086                                               | 0.0029 | 1.723                                     | 0.0670 | 0.050                                             | 0.0026 | 0.317                                            | 0.007 | 62.1   | 1.3 | 0.49                                                   | 0.01   |
| 40          | 0.100                                               | 0.0021 | 2.193                                     | 0.0660 | 0.046                                             | 0.0017 | 0.340                                            | 0.008 | 66.6   | 1.5 | 0.46                                                   | 0.01   |
| 48          | 0.107                                               | 0.0035 | 2.213                                     | 0.0720 | 0.048                                             | 0.0022 | 0.373                                            | 0.008 | 73.0   | 1.6 | 0.42                                                   | 0.01   |
| 60          | 0.110                                               | 0.0040 | 2.233                                     | 0.0780 | 0.049                                             | 0.0025 | 0.386                                            | 0.010 | 75.5   | 2.1 | 0.36                                                   | 0.01   |
| 72          | 0.096                                               | 0.0023 | 2.233                                     | 0.0610 | 0.043                                             | 0.0016 | 0.340                                            | 0.006 | 66.5   | 1.2 | 0.27                                                   | < 0.01 |
| 84          | 0.077                                               | 0.0015 | 2.243                                     | 0.0830 | 0.034                                             | 0.0014 | 0.333                                            | 0.012 | 65.1   | 2.4 | 0.23                                                   | 0.01   |
| 96          | 0.075                                               | 0.0025 | 2.370                                     | 0.0560 | 0.032                                             | 0.0013 | 0.323                                            | 0.007 | 63.2   | 1.3 | 0.19                                                   | < 0.01 |
| 108         | 0.068                                               | 0.0018 | 2.493                                     | 0.0470 | 0.027                                             | 0.0009 | 0.310                                            | 0.009 | 60.7   | 1.8 | 0.17                                                   | < 0.01 |
| 120         | 0.067                                               | 0.0023 | 2.557                                     | 0.0880 | 0.026                                             | 0.0013 | 0.307                                            | 0.009 | 60.2   | 1.7 | 0.15                                                   | < 0.01 |

**Note:** Avg is average value and SE is standard error.

**Table S12.** Kinetic profiles of concentration of PAC, [PAC] (mM), residual pyruvate, [Pyr] (mM), residual benzaldehyde, [Bz] (mM), benzoic acid, [Bzc] (mM), relative volumetric PDC activity, [Vol PDC] (%), pyruvate molarity balance, [Pyr Bal] (%), and benzaldehyde molarity balance, [Bz Bal] (%) during biotransformation in a single-phase emulsion system using the frozen – thawed whole cells biomass of co-culture between *C. tropicalis* TISTR 5306 and *S. cerevisiae* TISTR 5606 as a biocatalyst with initial [Pyr] / [Bz] of 120 / 100 mM.

| Time<br>(min) | [PAC] (mM) |      | [Pyr] (mM) |     | [Bz] (mM) |     | [Bzc] (mM) |       | [Vol PDC] (%) |      | [Bz Bal] (%) |      | [Pyr Bal] (%) |      |
|---------------|------------|------|------------|-----|-----------|-----|------------|-------|---------------|------|--------------|------|---------------|------|
|               | Avg        | SE   | Avg        | SE  | Avg       | SE  | Avg        | SE    | Avg           | SE   | Avg          | SE   | Avg           | SE   |
| 0             | 0.00       | 0.02 | 120.0      | 0.2 | 100.0     | 1.3 | 0.70       | 0.001 | 100.00        | 0.98 | 100.00       | 1.30 | 100.00        | 0.18 |
| 1             | 0.61       | 0.03 | 117.1      | 0.4 | 99.3      | 0.5 | 0.70       | 0.001 | 96.90         | 1.43 | 99.90        | 0.50 | 98.12         | 0.33 |
| 2             | 0.76       | 0.01 | 116.3      | 0.8 | 99.0      | 0.9 | 0.70       | 0.012 | 95.48         | 1.12 | 99.80        | 0.90 | 97.55         | 0.64 |
| 3             | 0.89       | 0.03 | 116.8      | 1.1 | 98.9      | 0.6 | 0.70       | 0.006 | 94.52         | 0.62 | 99.80        | 0.60 | 98.08         | 0.93 |
| 4             | 1.23       | 0.05 | 113.9      | 1.6 | 98.4      | 0.7 | 0.70       | 0.009 | 92.95         | 0.71 | 99.60        | 0.70 | 95.94         | 1.33 |
| 5             | 1.55       | 0.07 | 110.8      | 1.4 | 97.3      | 0.6 | 0.70       | 0.014 | 91.50         | 0.52 | 98.80        | 0.60 | 93.63         | 1.19 |
| 10            | 1.84       | 0.09 | 110.4      | 1.2 | 96.8      | 0.7 | 0.71       | 0.001 | 89.52         | 1.67 | 98.60        | 0.71 | 93.53         | 0.98 |
| 15            | 2.36       | 0.05 | 110.0      | 1.3 | 96.1      | 0.6 | 0.71       | 0.004 | 88.29         | 0.24 | 98.50        | 0.60 | 93.63         | 1.12 |
| 20            | 2.55       | 0.09 | 106.5      | 0.2 | 96.0      | 0.7 | 0.71       | 0.004 | 87.21         | 1.90 | 98.50        | 0.71 | 90.88         | 0.15 |
| 25            | 2.80       | 0.15 | 106.0      | 0.9 | 95.2      | 1.5 | 0.71       | 0.001 | 85.41         | 0.98 | 98.00        | 1.51 | 90.67         | 0.79 |
| 30            | 3.29       | 0.09 | 105.0      | 0.9 | 93.9      | 0.5 | 0.71       | 0.001 | 84.43         | 0.95 | 97.20        | 0.51 | 90.24         | 0.79 |
| 60            | 4.49       | 0.05 | 103.0      | 0.9 | 92.4      | 1.0 | 0.71       | 0.005 | 82.58         | 0.67 | 96.90        | 1.00 | 89.58         | 0.72 |
| 90            | 5.23       | 0.02 | 101.6      | 0.5 | 91.1      | 0.5 | 0.71       | 0.002 | 80.48         | 0.24 | 96.30        | 0.50 | 88.99         | 0.40 |
| 120           | 5.65       | 0.02 | 101.0      | 2.2 | 90.2      | 0.5 | 0.72       | 0.001 | 80.00         | 0.98 | 95.80        | 0.50 | 88.88         | 1.86 |
| 150           | 6.17       | 0.07 | 100.0      | 1.9 | 89.2      | 1.0 | 0.72       | 0.001 | 79.76         | 2.14 | 95.40        | 1.00 | 88.48         | 1.58 |
| 180           | 6.58       | 0.2  | 99.1       | 1.6 | 88.6      | 1.0 | 0.72       | 0.008 | 78.81         | 0.67 | 95.20        | 1.02 | 88.07         | 1.33 |
| 210           | 7.71       | 0.07 | 97.7       | 0.2 | 87.0      | 1.3 | 0.72       | 0.004 | 77.86         | 1.43 | 94.70        | 1.30 | 87.84         | 0.17 |
| 240           | 8.31       | 0.02 | 96.5       | 0.2 | 86.3      | 0.6 | 0.73       | 0.005 | 77.62         | 1.19 | 94.60        | 0.60 | 87.34         | 0.18 |
| 270           | 8.68       | 0.07 | 94.0       | 1.9 | 85.9      | 0.7 | 0.73       | 0.001 | 77.14         | 0.83 | 94.60        | 0.70 | 85.57         | 1.58 |
| 300           | 8.98       | 0.05 | 93.3       | 2.2 | 85.2      | 0.6 | 0.73       | 0.001 | 75.19         | 0.67 | 94.20        | 0.60 | 85.23         | 1.86 |
| 330           | 10.08      | 0.05 | 92.0       | 2.1 | 83.1      | 1.2 | 0.73       | 0.008 | 71.90         | 1.05 | 93.20        | 1.20 | 85.07         | 1.75 |
| 360           | 10.51      | 0.15 | 91.3       | 1.3 | 82.3      | 1.2 | 0.73       | 0.002 | 66.10         | 2.38 | 92.80        | 1.21 | 84.84         | 1.10 |

**Table S13.** Kinetic profiles of concentration of PAC, [PAC] (mM), residual pyruvate, [Pyr] (mM), residual benzaldehyde, [Bz] (mM), benzoic acid, [Bzc] (mM), relative volumetric PDC activity, [Vol PDC] (%), pyruvate molarity balance, [Pyr Bal] (%), and benzaldehyde molarity balance, [Bz Bal] (%) during biotransformation in a single-phase emulsion system using the frozen – thawed whole cells biomass of co-culture between *C. tropicalis* TISTR 5306 and *S. cerevisiae* TISTR 5606 as a biocatalyst with initial [Pyr] / [Bz] of 240 / 200 mM.

| Time<br>(min) | [PAC] (mM) |      | [Pyr] (mM) |     | [Bz] (mM) |     | [Bzc] (mM) |       | [Vol PDC] (%) |      | [Bz Bal] (%) |      | [Pyr Bal] (%) |      |
|---------------|------------|------|------------|-----|-----------|-----|------------|-------|---------------|------|--------------|------|---------------|------|
|               | Avg        | SE   | Avg        | SE  | Avg       | SE  | Avg        | SE    | Avg           | SE   | Avg          | SE   | Avg           | SE   |
| 0             | 0.00       | 0.03 | 240.0      | 0.4 | 200.0     | 0.4 | 1.40       | 0.062 | 100.00        | 1.06 | 100.00       | 0.37 | 100.00        | 0.33 |
| 1             | 0.20       | 0.04 | 221.0      | 0.5 | 199.2     | 1.0 | 1.44       | 0.001 | 92.82         | 0.87 | 99.71        | 0.95 | 92.17         | 0.44 |
| 2             | 0.26       | 0.03 | 220.3      | 1.8 | 199.1     | 0.5 | 1.44       | 0.008 | 92.44         | 0.95 | 99.66        | 0.49 | 91.90         | 1.48 |
| 3             | 0.32       | 0.07 | 219.5      | 1.0 | 198.4     | 0.2 | 1.44       | 0.006 | 89.79         | 1.13 | 99.37        | 0.20 | 91.59         | 0.83 |
| 4             | 0.45       | 0.05 | 218.2      | 1.6 | 198.1     | 1.2 | 1.46       | 0.010 | 88.47         | 1.06 | 99.28        | 1.24 | 91.10         | 1.33 |
| 5             | 0.58       | 0.03 | 217.5      | 0.2 | 196.9     | 0.3 | 1.46       | 0.003 | 85.44         | 0.76 | 98.73        | 0.27 | 90.87         | 0.17 |
| 10            | 0.80       | 0.03 | 215.7      | 0.7 | 196.6     | 0.7 | 1.46       | 0.013 | 83.10         | 0.93 | 98.69        | 0.65 | 90.21         | 0.58 |
| 15            | 1.10       | 0.08 | 214.5      | 0.2 | 196.2     | 0.7 | 1.48       | 0.010 | 80.91         | 2.65 | 98.65        | 0.71 | 89.83         | 0.16 |
| 20            | 1.54       | 0.08 | 214.0      | 1.5 | 195.6     | 1.1 | 1.48       | 0.038 | 80.72         | 0.74 | 98.56        | 1.06 | 89.81         | 1.25 |
| 25            | 2.01       | 0.09 | 213.0      | 1.2 | 193.3     | 0.4 | 1.50       | 0.007 | 80.15         | 1.32 | 97.67        | 0.40 | 89.59         | 0.98 |
| 30            | 2.05       | 0.13 | 208.3      | 1.5 | 193.0     | 1.5 | 1.50       | 0.001 | 78.82         | 2.08 | 97.50        | 1.50 | 87.65         | 1.24 |
| 60            | 3.20       | 0.03 | 207.0      | 0.8 | 191.6     | 0.9 | 1.50       | 0.003 | 76.75         | 2.65 | 97.41        | 0.93 | 87.58         | 0.68 |
| 90            | 3.85       | 0.04 | 206.1      | 2.2 | 190.0     | 1.0 | 1.50       | 0.011 | 75.75         | 1.89 | 96.91        | 0.98 | 87.48         | 1.80 |
| 120           | 4.60       | 0.05 | 205.3      | 0.4 | 189.1     | 0.2 | 1.52       | 0.003 | 73.43         | 1.08 | 96.87        | 0.19 | 87.46         | 0.29 |
| 150           | 5.30       | 0.03 | 203.9      | 0.3 | 185.7     | 0.9 | 1.52       | 0.006 | 71.08         | 1.19 | 95.51        | 0.89 | 87.17         | 0.25 |
| 180           | 5.80       | 0.01 | 203.5      | 1.8 | 184.9     | 0.2 | 1.52       | 0.006 | 70.38         | 0.38 | 95.34        | 0.22 | 87.21         | 1.48 |
| 210           | 6.46       | 0.13 | 202.8      | 0.1 | 182.9     | 1.1 | 1.54       | 0.004 | 69.00         | 0.53 | 94.67        | 1.06 | 87.19         | 0.15 |
| 240           | 7.25       | 0.03 | 202.0      | 1.9 | 182.0     | 0.2 | 1.56       | 0.006 | 67.30         | 1.25 | 94.62        | 0.15 | 87.19         | 1.62 |
| 270           | 7.45       | 0.04 | 201.8      | 0.3 | 180.1     | 0.5 | 1.56       | 0.027 | 61.92         | 0.19 | 93.77        | 0.50 | 87.19         | 0.27 |
| 300           | 7.85       | 0.04 | 201.0      | 2.3 | 179.2     | 0.8 | 1.56       | 0.004 | 54.63         | 0.72 | 93.52        | 0.84 | 87.02         | 1.89 |
| 330           | 8.55       | 0.06 | 196.0      | 1.9 | 177.4     | 0.7 | 1.56       | 0.001 | 40.45         | 1.10 | 92.95        | 0.71 | 85.23         | 1.59 |
| 360           | 8.60       | 0.01 | 189.0      | 2.1 | 175.4     | 0.5 | 1.56       | 0.004 | 29.68         | 1.32 | 92.00        | 0.48 | 82.33         | 1.73 |

**Table S14.** Kinetic profiles for organic phase during biotransformation in a two-phase emulsion system using frozen-thawed whole cells of co-culture between *C. tropicalis* TISTR 5306 and *S. cerevisiae* TISTR 5606 as a biocatalyst with initial [Pyr]/[Bz] of 120/100 mM. Similar abbreviated terms of chemical species, molarity balances, and relative activity were used as previously described in captions of Tables S7–S9, S12 and S13. Avg is average value and SE is standard error.

| Time<br>(min) | [PAC] (mM) |      | [Pyr] (mM) |     | [Bz] (mM) |     | [Bzc] (mM) |       | [Vol PDC] (%) |      |
|---------------|------------|------|------------|-----|-----------|-----|------------|-------|---------------|------|
|               | Avg        | SE   | Avg        | SE  | Avg       | SE  | Avg        | SE    | Avg           | SE   |
| 0             | 0.00       | 0.00 | 0.0        | 0.0 | 90.2      | 0.4 | 0.17       | 0.005 | 0.00          | 0.00 |
| 1             | 0.56       | 0.01 | 0.0        | 0.0 | 89.6      | 1.0 | 0.18       | 0.008 | 0.00          | 0.00 |
| 2             | 0.71       | 0.02 | 0.0        | 0.0 | 88.6      | 0.5 | 0.18       | 0.003 | 0.00          | 0.00 |
| 3             | 1.38       | 0.06 | 0.0        | 0.0 | 87.3      | 0.2 | 0.18       | 0.005 | 0.00          | 0.00 |
| 4             | 1.64       | 0.03 | 0.0        | 0.0 | 87.0      | 1.2 | 0.19       | 0.008 | 0.00          | 0.00 |
| 5             | 2.04       | 0.03 | 0.0        | 0.0 | 86.5      | 0.3 | 0.19       | 0.003 | 0.00          | 0.00 |
| 10            | 3.04       | 0.09 | 0.0        | 0.0 | 85.1      | 0.7 | 0.19       | 0.004 | 0.00          | 0.00 |
| 15            | 5.22       | 0.09 | 0.0        | 0.0 | 82.1      | 0.7 | 0.19       | 0.004 | 0.00          | 0.00 |
| 20            | 5.44       | 0.24 | 0.0        | 0.0 | 81.6      | 1.1 | 0.19       | 0.003 | 0.00          | 0.00 |
| 25            | 8.10       | 0.24 | 0.0        | 0.0 | 78.7      | 0.4 | 0.19       | 0.003 | 0.00          | 0.00 |
| 30            | 9.14       | 0.18 | 0.0        | 0.0 | 77.0      | 1.5 | 0.19       | 0.003 | 0.00          | 0.00 |
| 60            | 11.31      | 0.12 | 0.0        | 0.0 | 73.6      | 0.9 | 0.19       | 0.001 | 0.00          | 0.00 |
| 90            | 12.58      | 0.12 | 0.0        | 0.0 | 72.3      | 1.0 | 0.20       | 0.003 | 0.00          | 0.00 |
| 120           | 14.95      | 0.24 | 0.0        | 0.0 | 69.6      | 0.2 | 0.20       | 0.003 | 0.00          | 0.00 |
| 150           | 15.05      | 0.09 | 0.0        | 0.0 | 69.3      | 0.9 | 0.20       | 0.003 | 0.00          | 0.00 |
| 180           | 15.29      | 0.12 | 0.0        | 0.0 | 68.6      | 0.2 | 0.20       | 0.005 | 0.00          | 0.00 |
| 210           | 15.41      | 0.24 | 0.0        | 0.0 | 68.2      | 1.1 | 0.20       | 0.001 | 0.00          | 0.00 |
| 240           | 16.68      | 0.09 | 0.0        | 0.0 | 65.8      | 0.2 | 0.20       | 0.011 | 0.00          | 0.00 |
| 270           | 17.19      | 0.03 | 0.0        | 0.0 | 65.3      | 0.5 | 0.21       | 0.004 | 0.00          | 0.00 |
| 300           | 19.15      | 0.12 | 0.0        | 0.0 | 62.7      | 0.8 | 0.21       | 0.004 | 0.00          | 0.00 |
| 330           | 20.29      | 0.27 | 0.0        | 0.0 | 61.4      | 0.7 | 0.22       | 0.001 | 0.00          | 0.00 |
| 360           | 21.69      | 0.27 | 0.0        | 0.0 | 57.6      | 0.5 | 0.22       | 0.007 | 0.00          | 0.00 |

**Table S15.** Kinetic profiles for aqueous phase during biotransformation in a two-phase emulsion system using frozen-thawed whole cells of co-culture between *C. tropicalis* TISTR 5306 and *S. cerevisiae* TISTR 5606 as a biocatalyst with initial [Pyr]/[Bz] of 120/100 mM. Similar abbreviated terms of chemical species, molarity balances, and relative activity were used as previously described in captions of Tables S7–S9, S12 and S13. Avg is average value and SE is standard error.

| Time<br>(min) | [PAC] (mM) |      | [Pyr] (mM) |     | [Bz] (mM) |     | [Bzc] (mM) |       | [Vol PDC] (%) |      |
|---------------|------------|------|------------|-----|-----------|-----|------------|-------|---------------|------|
|               | Avg        | SE   | Avg        | SE  | Avg       | SE  | Avg        | SE    | Avg           | SE   |
| 0             | 0.00       | 0.00 | 120.0      | 1.0 | 9.8       | 0.0 | 0.56       | 0.004 | 100.00        | 0.85 |
| 1             | 0.12       | 0.01 | 114.3      | 2.8 | 9.7       | 0.2 | 0.56       | 0.003 | 93.93         | 0.78 |
| 2             | 0.15       | 0.01 | 112.5      | 2.9 | 9.6       | 0.0 | 0.57       | 0.001 | 90.89         | 1.00 |
| 3             | 0.41       | 0.02 | 111.1      | 2.8 | 9.4       | 0.1 | 0.57       | 0.003 | 89.52         | 0.74 |
| 4             | 0.55       | 0.01 | 110.3      | 1.4 | 9.2       | 0.0 | 0.58       | 0.007 | 87.47         | 0.56 |
| 5             | 0.56       | 0.02 | 109.3      | 0.5 | 9.1       | 0.2 | 0.58       | 0.003 | 85.33         | 0.19 |
| 10            | 0.80       | 0.03 | 107.9      | 1.5 | 8.9       | 0.1 | 0.58       | 0.005 | 81.34         | 0.56 |
| 15            | 1.59       | 0.04 | 104.4      | 1.7 | 8.6       | 0.3 | 0.58       | 0.007 | 76.67         | 1.22 |
| 20            | 1.76       | 0.05 | 103.5      | 1.4 | 8.4       | 0.1 | 0.58       | 0.012 | 73.67         | 1.85 |
| 25            | 1.96       | 0.00 | 100.2      | 0.1 | 7.8       | 0.1 | 0.58       | 0.001 | 72.44         | 0.93 |
| 30            | 2.23       | 0.02 | 98.4       | 0.3 | 7.5       | 0.0 | 0.59       | 0.007 | 70.00         | 0.67 |
| 60            | 3.62       | 0.10 | 94.6       | 0.4 | 7.1       | 0.0 | 0.59       | 0.024 | 64.07         | 1.07 |
| 90            | 3.69       | 0.09 | 93.0       | 2.5 | 7.0       | 0.1 | 0.59       | 0.001 | 63.15         | 1.52 |
| 120           | 4.14       | 0.04 | 90.0       | 0.5 | 6.7       | 0.1 | 0.59       | 0.011 | 60.93         | 2.22 |
| 150           | 4.43       | 0.04 | 88.4       | 1.7 | 6.6       | 0.0 | 0.59       | 0.012 | 56.67         | 1.85 |
| 180           | 4.67       | 0.03 | 87.8       | 3.0 | 6.5       | 0.2 | 0.59       | 0.023 | 52.33         | 1.74 |
| 210           | 4.80       | 0.10 | 87.0       | 2.7 | 6.4       | 0.2 | 0.59       | 0.001 | 47.41         | 1.11 |
| 240           | 5.80       | 0.04 | 83.2       | 2.3 | 6.1       | 0.2 | 0.59       | 0.004 | 43.11         | 1.67 |
| 270           | 5.89       | 0.04 | 82.0       | 2.1 | 6.1       | 0.3 | 0.60       | 0.011 | 39.52         | 1.11 |
| 300           | 6.00       | 0.09 | 78.4       | 0.9 | 6.0       | 0.2 | 0.60       | 0.019 | 35.15         | 1.26 |
| 330           | 6.04       | 0.10 | 75.0       | 2.9 | 5.8       | 0.2 | 0.60       | 0.009 | 30.70         | 1.63 |
| 360           | 9.07       | 0.05 | 71.2       | 2.2 | 5.5       | 0.2 | 0.61       | 0.018 | 20.37         | 0.44 |

**Table S16.** Kinetic profiles for combined phase during biotransformation in a two-phase emulsion system using frozen-thawed whole cells of co-culture between *C. tropicalis* TISTR 5306 and *S. cerevisiae* TISTR 5606 as described in Tables S14 and S15. The reported values in the combined phase are the averages obtained from both the organic and aqueous phases. Avg is average value and SE is standard error.

| Time<br>(min) | [PAC] (mM) |      | [Pyr] (mM) |     | [Bz] (mM) |     | [Bzc] (mM) |       | [Vol PDC] (%) |      | [Bz Bal] (%) |      | [Pyr Bal] (%) |      |
|---------------|------------|------|------------|-----|-----------|-----|------------|-------|---------------|------|--------------|------|---------------|------|
|               | Avg        | SE   | Avg        | SE  | Avg       | SE  | Avg        | SE    | Avg           | SE   | Avg          | SE   | Avg           | SE   |
| 0             | 0.00       | 0.00 | 60.0       | 0.5 | 50.0      | 0.2 | 0.37       | 0.003 | 50.00         | 0.43 | 100.00       | 0.19 | 100.00        | 0.43 |
| 1             | 0.34       | 0.01 | 57.1       | 1.4 | 49.7      | 0.5 | 0.37       | 0.004 | 46.97         | 0.39 | 100.00       | 0.49 | 95.78         | 1.15 |
| 2             | 0.43       | 0.01 | 56.2       | 1.4 | 49.1      | 0.2 | 0.38       | 0.002 | 45.45         | 0.50 | 98.99        | 0.25 | 94.45         | 1.20 |
| 3             | 0.90       | 0.03 | 55.5       | 1.4 | 48.3      | 0.1 | 0.38       | 0.003 | 44.76         | 0.37 | 98.45        | 0.12 | 94.06         | 1.15 |
| 4             | 1.10       | 0.02 | 55.1       | 0.7 | 48.1      | 0.6 | 0.39       | 0.005 | 43.74         | 0.28 | 98.38        | 0.62 | 93.71         | 0.56 |
| 5             | 1.30       | 0.02 | 54.7       | 0.3 | 47.8      | 0.2 | 0.39       | 0.002 | 42.67         | 0.10 | 98.22        | 0.17 | 93.27         | 0.21 |
| 10            | 1.92       | 0.05 | 54.0       | 0.8 | 47.0      | 0.3 | 0.39       | 0.003 | 40.67         | 0.28 | 97.74        | 0.33 | 93.12         | 0.63 |
| 15            | 3.41       | 0.05 | 52.2       | 0.9 | 45.3      | 0.4 | 0.39       | 0.004 | 38.34         | 0.61 | 97.44        | 0.38 | 92.68         | 0.71 |
| 20            | 3.60       | 0.12 | 51.7       | 0.7 | 45.0      | 0.5 | 0.39       | 0.006 | 36.84         | 0.93 | 97.12        | 0.55 | 92.23         | 0.59 |
| 25            | 5.03       | 0.12 | 50.1       | 0.1 | 43.3      | 0.2 | 0.39       | 0.002 | 36.22         | 0.47 | 96.59        | 0.24 | 91.88         | 0.11 |
| 30            | 5.69       | 0.09 | 49.2       | 0.2 | 42.2      | 0.7 | 0.39       | 0.004 | 35.00         | 0.34 | 95.83        | 0.75 | 91.48         | 0.15 |
| 60            | 7.47       | 0.08 | 47.3       | 0.2 | 40.3      | 0.5 | 0.39       | 0.012 | 32.04         | 0.54 | 95.61        | 0.47 | 91.24         | 0.18 |
| 90            | 8.14       | 0.08 | 46.5       | 1.3 | 39.6      | 0.5 | 0.40       | 0.002 | 31.58         | 0.76 | 95.55        | 0.50 | 91.06         | 1.05 |
| 120           | 9.55       | 0.12 | 45.0       | 0.3 | 38.1      | 0.1 | 0.40       | 0.006 | 30.47         | 1.11 | 95.37        | 0.16 | 90.91         | 0.25 |
| 150           | 9.74       | 0.05 | 44.2       | 0.9 | 37.9      | 0.4 | 0.40       | 0.006 | 28.34         | 0.93 | 95.29        | 0.45 | 89.88         | 0.71 |
| 180           | 9.98       | 0.06 | 43.9       | 1.5 | 37.5      | 0.2 | 0.40       | 0.012 | 26.17         | 0.87 | 95.04        | 0.17 | 89.80         | 1.23 |
| 210           | 10.11      | 0.13 | 43.5       | 1.4 | 37.3      | 0.5 | 0.40       | 0.001 | 23.71         | 0.56 | 94.79        | 0.55 | 89.34         | 1.13 |
| 240           | 11.24      | 0.05 | 41.6       | 1.2 | 36.0      | 0.1 | 0.40       | 0.006 | 21.56         | 0.84 | 94.41        | 0.13 | 88.07         | 0.96 |
| 270           | 11.54      | 0.03 | 41.0       | 1.1 | 35.7      | 0.3 | 0.41       | 0.006 | 19.76         | 0.56 | 94.39        | 0.28 | 87.57         | 0.88 |
| 300           | 12.58      | 0.08 | 39.2       | 0.5 | 34.3      | 0.4 | 0.41       | 0.010 | 17.58         | 0.63 | 93.79        | 0.44 | 86.29         | 0.38 |
| 330           | 13.17      | 0.14 | 37.5       | 1.5 | 33.6      | 0.4 | 0.41       | 0.005 | 15.35         | 0.82 | 93.54        | 0.40 | 84.44         | 1.21 |
| 360           | 15.38      | 0.14 | 35.6       | 1.1 | 31.5      | 0.3 | 0.42       | 0.010 | 10.19         | 0.22 | 93.83        | 0.29 | 84.97         | 0.92 |
